# Supplementary material for: Aerosol-assisted deposition of gold nanoparticle-tin dioxide composite films
Source: Royal Society of Chemistry journal article supplement (doi:10.1039/c3ra46828c), 2014-01-01
Supplement: c3ra46828c1.pdf [file c3ra46828c1.pdf]

## Electronic Supplementary Information

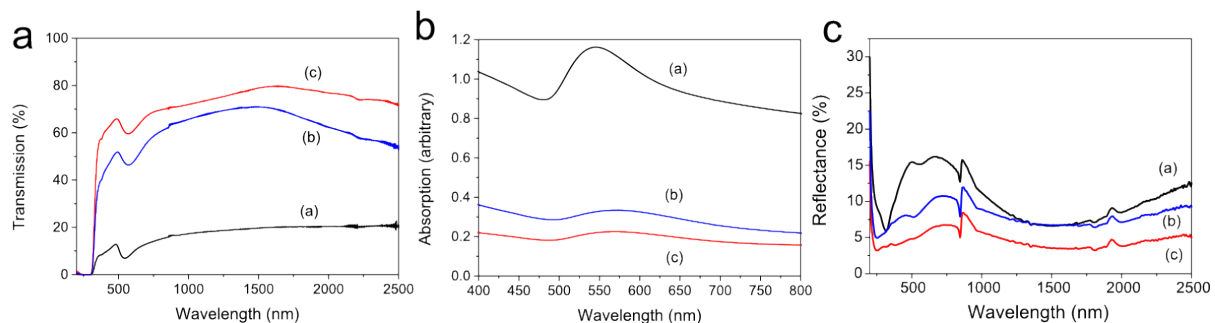

**Figure 1** Transmission, absorption and reflection spectra below correspond to depositions from a precursor solution of 0.06 Au:Sn atomic ratio at 500 °C in 20 ml methanol on the top plate. Depositions on the top plate were solely gold nanoparticles and so (a), (b) and (c) refer to different areas of deposition
